# Supplementary material for: Antibody Bioconjugates Incorporating Bacterial formyl-Met Peptides Engage Neutrophils in Targeted Cell Killing
Source: Research Square preprint supplement (doi:10.21203/rs.3.rs-2406517/v1), 2023-02-01
Supplement: Supplementary file 1 [file 34c691f3b96314c2073a7773.pdf]

## Reporting Summary

Nature Portfolio wishes to improve the reproducibility of the work that we publish. This form provides structure for consistency and transparency in reporting. For further information on Nature Portfolio policies, see our [Editorial Policies](#) and the [Editorial Policy Checklist](#).

### Statistics

For all statistical analyses, confirm that the following items are present in the figure legend, table legend, main text, or Methods section.

- |                                     |                                                                                                                                                                                                                                                                                     |
|-------------------------------------|-------------------------------------------------------------------------------------------------------------------------------------------------------------------------------------------------------------------------------------------------------------------------------------|
| n/a                                 | Confirmed                                                                                                                                                                                                                                                                           |
| <input type="checkbox"/>            | <input checked="" type="checkbox"/> The exact sample size ( $n$ ) for each experimental group/condition, given as a discrete number and unit of measurement                                                                                                                         |
| <input type="checkbox"/>            | <input checked="" type="checkbox"/> A statement on whether measurements were taken from distinct samples or whether the same sample was measured repeatedly                                                                                                                         |
| <input type="checkbox"/>            | <input checked="" type="checkbox"/> The statistical test(s) used AND whether they are one- or two-sided<br><i>Only common tests should be described solely by name; describe more complex techniques in the Methods section.</i>                                                    |
| <input checked="" type="checkbox"/> | <input type="checkbox"/> A description of all covariates tested                                                                                                                                                                                                                     |
| <input checked="" type="checkbox"/> | <input type="checkbox"/> A description of any assumptions or corrections, such as tests of normality and adjustment for multiple comparisons                                                                                                                                        |
| <input checked="" type="checkbox"/> | <input type="checkbox"/> A full description of the statistical parameters including central tendency (e.g. means) or other basic estimates (e.g. regression coefficient) AND variation (e.g. standard deviation) or associated estimates of uncertainty (e.g. confidence intervals) |
| <input checked="" type="checkbox"/> | <input type="checkbox"/> For null hypothesis testing, the test statistic (e.g. $F$ , $t$ , $r$ ) with confidence intervals, effect sizes, degrees of freedom and $P$ value noted<br><i>Give <math>P</math> values as exact values whenever suitable.</i>                            |
| <input checked="" type="checkbox"/> | <input type="checkbox"/> For Bayesian analysis, information on the choice of priors and Markov chain Monte Carlo settings                                                                                                                                                           |
| <input checked="" type="checkbox"/> | <input type="checkbox"/> For hierarchical and complex designs, identification of the appropriate level for tests and full reporting of outcomes                                                                                                                                     |
| <input checked="" type="checkbox"/> | <input type="checkbox"/> Estimates of effect sizes (e.g. Cohen's $d$ , Pearson's $r$ ), indicating how they were calculated                                                                                                                                                         |

Our web collection on [statistics for biologists](#) contains articles on many of the points above.

### Software and code

Policy information about [availability of computer code](#)

- |                 |                                                                                                                                                    |
|-----------------|----------------------------------------------------------------------------------------------------------------------------------------------------|
| Data collection | RTCA xIMT ver 1.2. Perkin-Elmer In Vivo Imaging System (IVIS). BioTek Gen5 ver 3.1. EnVision Manager ver 1.14. RTCA eSight ver 1.1.2. BD FACSverse |
| Data analysis   | Graphpad Prism ver 9.5.0. Living Image 4.7.2. GastroPlus ver 9.6. FlowJo ver 10.8.1                                                                |

For manuscripts utilizing custom algorithms or software that are central to the research but not yet described in published literature, software must be made available to editors and reviewers. We strongly encourage code deposition in a community repository (e.g. GitHub). See the Nature Portfolio [guidelines for submitting code & software](#) for further information.

### Data

Policy information about [availability of data](#)

All manuscripts must include a [data availability statement](#). This statement should provide the following information, where applicable:

- Accession codes, unique identifiers, or web links for publicly available datasets
- A description of any restrictions on data availability
- For clinical datasets or third party data, please ensure that the statement adheres to our [policy](#)

The authors will comply with requests for access to the datasets necessary to interpret, verify and extend the research. Requests should be submitted to the corresponding author (MDL).

## Human research participants

Policy information about [studies involving human research participants and Sex and Gender in Research](#).

### Reporting on sex and gender

Use the terms sex (biological attribute) and gender (shaped by social and cultural circumstances) carefully in order to avoid confusing both terms. Indicate if findings apply to only one sex or gender; describe whether sex and gender were considered in study design whether sex and/or gender was determined based on self-reporting or assigned and methods used. Provide in the source data disaggregated sex and gender data where this information has been collected, and consent has been obtained for sharing of individual-level data; provide overall numbers in this Reporting Summary. Please state if this information has not been collected. Report sex- and gender-based analyses where performed, justify reasons for lack of sex- and gender-based analysis.

### Population characteristics

Describe the covariate-relevant population characteristics of the human research participants (e.g. age, genotypic information, past and current diagnosis and treatment categories). If you filled out the behavioural & social sciences study design questions and have nothing to add here, write "See above."

### Recruitment

Describe how participants were recruited. Outline any potential self-selection bias or other biases that may be present and how these are likely to impact results.

### Ethics oversight

Identify the organization(s) that approved the study protocol.

Note that full information on the approval of the study protocol must also be provided in the manuscript.

## Field-specific reporting

Please select the one below that is the best fit for your research. If you are not sure, read the appropriate sections before making your selection.

☒ Life sciences ☐ Behavioural & social sciences ☐ Ecological, evolutionary & environmental sciences

For a reference copy of the document with all sections, see [nature.com/documents/nr-reporting-summary-flat.pdf](https://www.nature.com/documents/nr-reporting-summary-flat.pdf)

## Life sciences study design

All studies must disclose on these points even when the disclosure is negative.

### Sample size

The sample size of n=8-10 mice per group was based on a preliminary dose ranging experiment with this tumor model, where this sample size was able to distinguish treatment effect of 5 mg/kg trastuzumab vs isotype control. No formal sample size calculation was conducted.

### Data exclusions

No data were excluded from the analyses.

### Replication

The in vivo tumor model was a single experiment with n=8-10 mice per group. Tumor size was monitored by 2 orthogonal methods, caliper measurement and imaging

### Randomization

Naive SCID mice were randomly allocated to treatment groups for surgical implantation of the SKOV3 cells in matrigel.

### Blinding

Tumor size determinations were conducted by investigators blinded to treatment assignment.

## Reporting for specific materials, systems and methods

We require information from authors about some types of materials, experimental systems and methods used in many studies. Here, indicate whether each material, system or method listed is relevant to your study. If you are not sure if a list item applies to your research, read the appropriate section before selecting a response.

### Materials & experimental systems

| n/a                                 | Involved in the study                                           |
|-------------------------------------|-----------------------------------------------------------------|
| <input type="checkbox"/>            | <input checked="" type="checkbox"/> Antibodies                  |
| <input type="checkbox"/>            | <input checked="" type="checkbox"/> Eukaryotic cell lines       |
| <input checked="" type="checkbox"/> | <input type="checkbox"/> Palaeontology and archaeology          |
| <input type="checkbox"/>            | <input checked="" type="checkbox"/> Animals and other organisms |
| <input checked="" type="checkbox"/> | <input type="checkbox"/> Clinical data                          |
| <input checked="" type="checkbox"/> | <input type="checkbox"/> Dual use research of concern           |

### Methods

| n/a                                 | Involved in the study                              |
|-------------------------------------|----------------------------------------------------|
| <input checked="" type="checkbox"/> | <input type="checkbox"/> ChIP-seq                  |
| <input type="checkbox"/>            | <input checked="" type="checkbox"/> Flow cytometry |
| <input checked="" type="checkbox"/> | <input type="checkbox"/> MRI-based neuroimaging    |

## Antibodies

|                 |                                                                                                                                                                                                                                                                                                                                                                                                |
|-----------------|------------------------------------------------------------------------------------------------------------------------------------------------------------------------------------------------------------------------------------------------------------------------------------------------------------------------------------------------------------------------------------------------|
| Antibodies used | Human CD66b (BD, Cat. Nu. 564679; final dilution ratio 1:24); Ly-6C (BioLegend, Clone HK1.4, 1:40 dilution), Ly-6G (BD, Clone 1A8, 1:50 dilution ratio), CD45 (BioLegend, clone 30-F11, 1:40 dilution ratio). F4/80 (BioLegend, clone BM8, 1:250 dilution ratio). CD11b (BioLegend, clone M1/70, 1:250 dilution ratio). I-A/I-E (MHC-II) (BioLegend, clone M5/114.15.2, 1:250 dilution ratio). |
| Validation      | Antibodies were not independently validated.                                                                                                                                                                                                                                                                                                                                                   |

## Eukaryotic cell lines

Policy information about [cell lines and Sex and Gender in Research](#)

|                                                                      |                                                                                                                                                                                                        |
|----------------------------------------------------------------------|--------------------------------------------------------------------------------------------------------------------------------------------------------------------------------------------------------|
| Cell line source(s)                                                  | SKOV3 cells were obtained from ATCC, (SK-OV-3 [SKOV-3;SKOV3] (ATCC® HTB77™)), female<br>Primary human neutrophils were isolated from normal human donor blood and used on the day of blood collection. |
| Authentication                                                       | SKOV3 cells were not independently authenticated                                                                                                                                                       |
| Mycoplasma contamination                                             | Cell lines were not tested for mycoplasma contamination                                                                                                                                                |
| Commonly misidentified lines<br>(See <a href="#">ICLAC</a> register) | Name any commonly misidentified cell lines used in the study and provide a rationale for their use.                                                                                                    |

## Animals and other research organisms

Policy information about [studies involving animals](#); [ARRIVE guidelines](#) recommended for reporting animal research, and [Sex and Gender in Research](#)

|                         |                                                                                                                                                                                                                                                                                                                                                          |
|-------------------------|----------------------------------------------------------------------------------------------------------------------------------------------------------------------------------------------------------------------------------------------------------------------------------------------------------------------------------------------------------|
| Laboratory animals      | female C.B.17 SCID mice, 20-22 gm                                                                                                                                                                                                                                                                                                                        |
| Wild animals            | <i>Provide details on animals observed in or captured in the field; report species and age where possible. Describe how animals were caught and transported and what happened to captive animals after the study (if killed, explain why and describe method; if released, say where and when) OR state that the study did not involve wild animals.</i> |
| Reporting on sex        | Studies were conducted in female mice to minimized potential variability due to sex differences.                                                                                                                                                                                                                                                         |
| Field-collected samples | <i>For laboratory work with field-collected samples, describe all relevant parameters such as housing, maintenance, temperature, photoperiod and end-of-experiment protocol OR state that the study did not involve samples collected from the field.</i>                                                                                                |
| Ethics oversight        | The experiments were conducted in accordance with US legislation governing animal studies and the experimental protocols were approved by the Lilly Animal Care and Use Committee and performed in accordance with approved guidelines                                                                                                                   |

Note that full information on the approval of the study protocol must also be provided in the manuscript.

## Flow Cytometry

### Plots

Confirm that:

- ☒ The axis labels state the marker and fluorochrome used (e.g. CD4-FITC).
- ☒ The axis scales are clearly visible. Include numbers along axes only for bottom left plot of group (a 'group' is an analysis of identical markers).
- ☒ All plots are contour plots with outliers or pseudocolor plots.
- ☐ A numerical value for number of cells or percentage (with statistics) is provided.

### Methodology

|                    |                                                                                                                                                                                                                                                                                                                                                                                                                                                                                                                                                                                                                                                                                                                                                                                                                                                                                                                                                                                                                                                                   |
|--------------------|-------------------------------------------------------------------------------------------------------------------------------------------------------------------------------------------------------------------------------------------------------------------------------------------------------------------------------------------------------------------------------------------------------------------------------------------------------------------------------------------------------------------------------------------------------------------------------------------------------------------------------------------------------------------------------------------------------------------------------------------------------------------------------------------------------------------------------------------------------------------------------------------------------------------------------------------------------------------------------------------------------------------------------------------------------------------|
| Sample preparation | Mouse SKOV3 tumors were harvested and placed in 24 well dishes in PBS on ice. A 40 micron cell strainer was placed on top of a 50ml conical tube and prewet with ice cold PBS. Each tumor was placed in an individual cell strainer and dissociated using the tip of a plunger from a 3ml syringe to process the tumor through the cell strainer, followed by wash with 1-5mls of ice cold PBS. The process was repeated until no tissue remained on the filter. Each tube was then filled to 30mls with ice cold PBS and centrifuged at 320xg for 10 minutes. Supernatant was removed and the cell pellet resuspended in 5mls of ice cold PBS. 10ul of cell suspension was removed for cell counts and 1x10 <sup>6</sup> cells were removed for staining and characterization by flow. The cells were stained for viability and markers to detect infiltrating neutrophils. Neutrophils were identified as CD45+/CD11b+/LY6C+/LY6G+ cells. 10K live CD45+ events (cells) per sample were captured on the BD FACSVerser cytometer for analysis of forward scatter |
| Instrument         | BD FACSVerser cytometer                                                                                                                                                                                                                                                                                                                                                                                                                                                                                                                                                                                                                                                                                                                                                                                                                                                                                                                                                                                                                                           |

|                           |                                                                                                                                                                  |
|---------------------------|------------------------------------------------------------------------------------------------------------------------------------------------------------------|
| Software                  | FlowJo ver 10.8.1                                                                                                                                                |
| Cell population abundance | CD45+ cells were 1% - 19% of live cells in tumors from SCID mice. Tumor infiltrating neutrophils were 12% to 76% of CD45+ positive cells in tumors in SCID mice. |
| Gating strategy           | Neutrophils were identified as live CD45+/CD11b+/LY6C+/LY6G+ cells.                                                                                              |

☒ Tick this box to confirm that a figure exemplifying the gating strategy is provided in the Supplementary Information.
